# Supplementary material for: A new drought index fitted to clay shrinkage induced subsidence over France: benefits of interactive leaf area index
Source: Copernicus journal article supplement (doi:10.5194/egusphere-2023-1366), 2023-07-27
Supplement: Supplementary file 1 [file egusphere-2023-1366-supplement.pdf]

# A new drought index fitted to clay shrinkage induced subsidence over France: benefits of interactive leaf area index

Sophie Barthélemy<sup>1,2,3</sup>, Bertrand Bonan<sup>1</sup>, Jean-Christophe Calvet<sup>1</sup>, Gilles Grandjean<sup>2</sup>, David Moncoulon<sup>3</sup>, Dorothée Kapsambelis<sup>3</sup>, and Séverine Bernardie<sup>2</sup>

- 5 <sup>1</sup>CNRM, Université de Toulouse, Météo-France, CNRS, Toulouse, France  
<sup>2</sup>Bureau de Recherches Géologiques et Minières (BRGM), Orléans, France  
<sup>3</sup>Caisse Centrale de Réassurance (CCR), Dpt R&D Modeling Cat & Agriculture, Paris, France

Correspondence to: Jean-Christophe Calvet ([jean-christophe.calvet@meteo.fr](mailto:jean-christophe.calvet@meteo.fr))

## Supplementary material

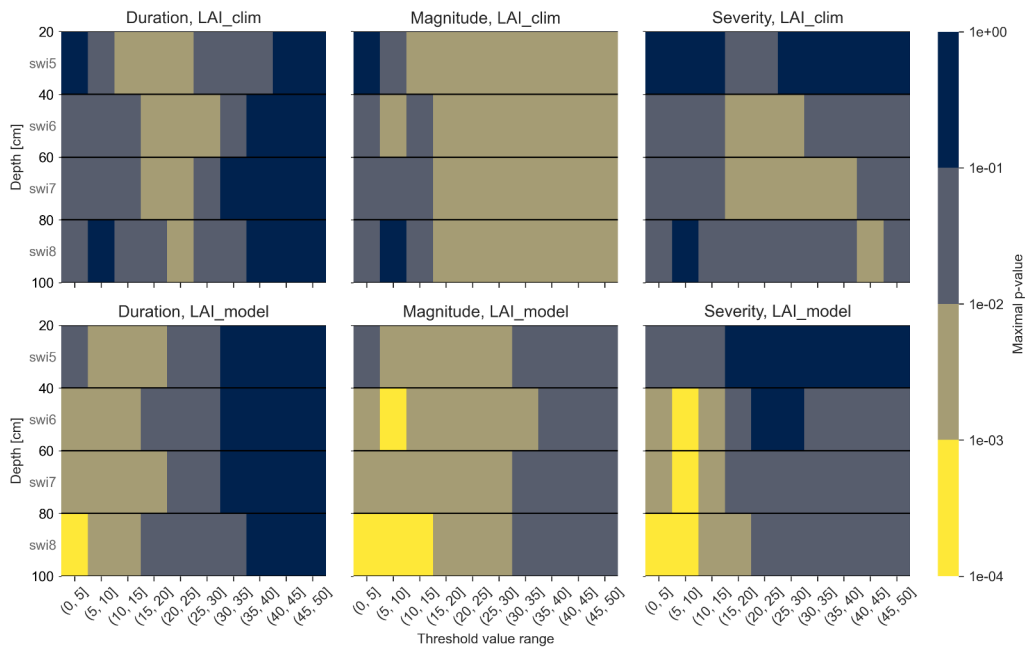

Figure S1: Maximal p-value obtained per group, computing the rank correlation between drought index and normalized number of claims, for all calibration subsets, separating index type (Duration, Magnitude, Severity), model simulation (LAI\_clim, LAI\_model), model layer (swi5 to swi8) and threshold value range (from 1 to 50 in groups of five).

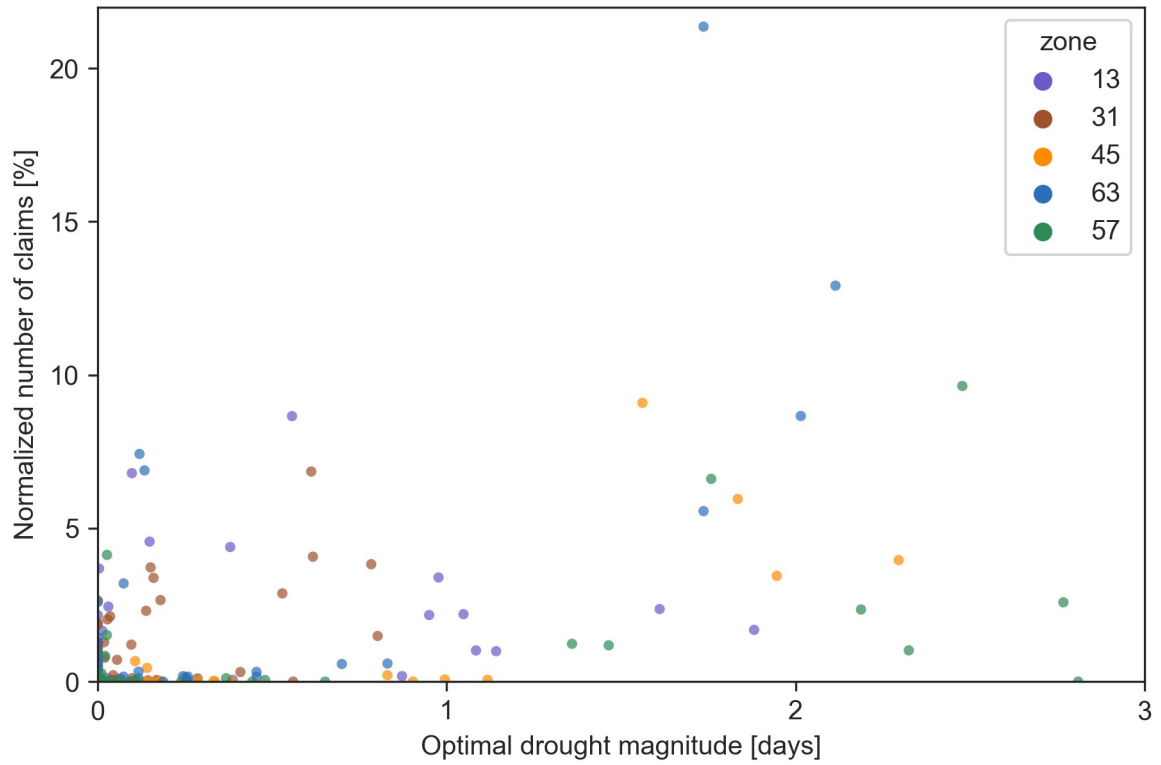

*Figure S2: Normalized number of claims versus optimal drought magnitude, for the calibration set. The colors correspond to the five regional subsets.*

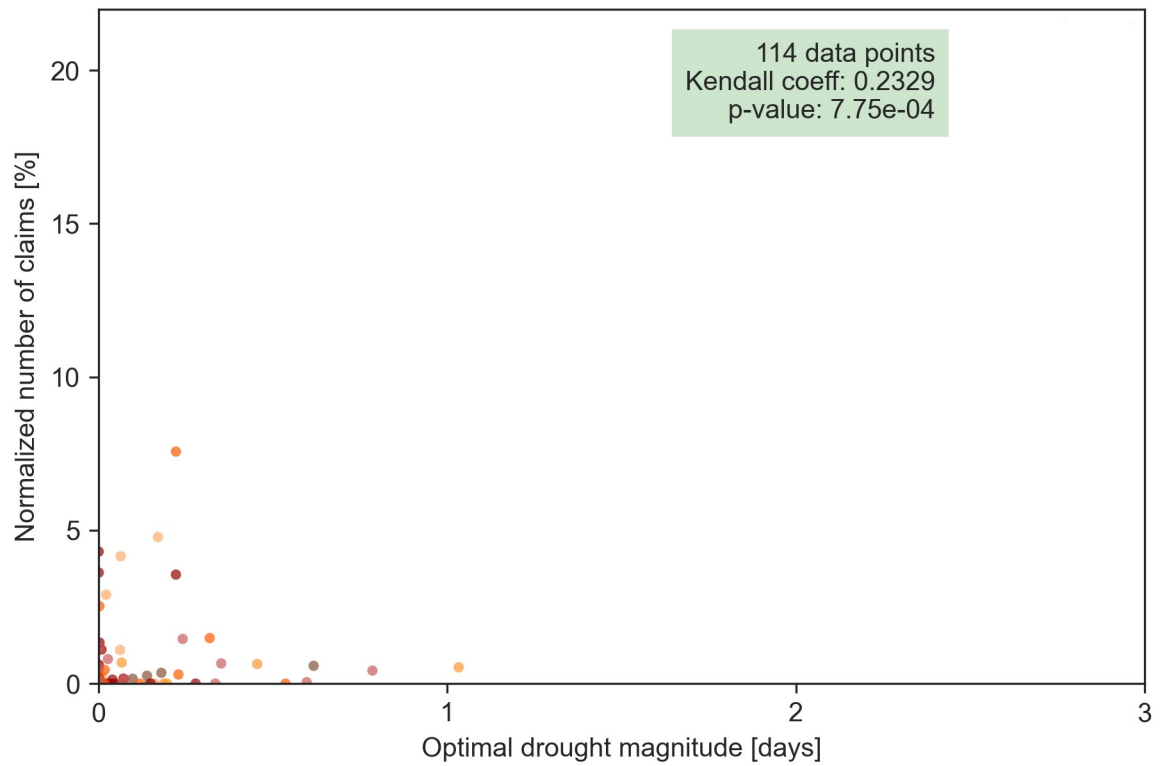

*Figure S3: Normalized number of claims versus optimal drought magnitude, for the validation set. The colors correspond to the six different municipalities.*
